# Supplementary material for: wtest: an integrated R package for genetic epistasis testing
Source: PubMed Central journal article supplement (PMC6929460; doi:10.1186/s12920-019-0638-9), 2019-12-24

**Additional file 1 – Convergency simulation study**

Coefficient of variance of  $h$  at different  $B$  for pairwise interactions. Simulated dataset contains 1,000 subjects and 1,000 SNPs. A convergent  $h$  and  $f$  estimation is reached at  $B > 400$ .

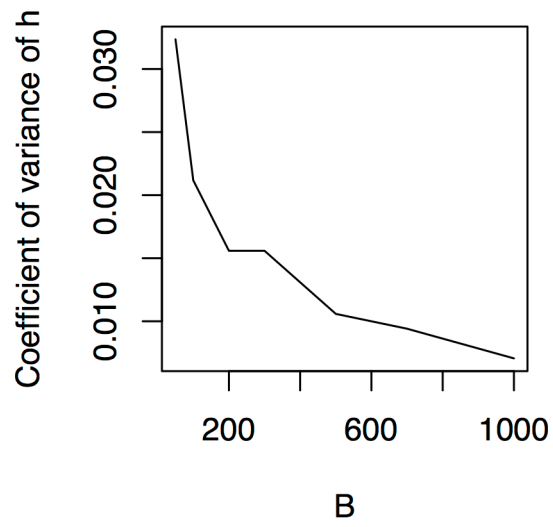

Supplement: 12920_2019_638_MOESM1_ESM.pdf [file 12920_2019_638_MOESM1_ESM.pdf]
